# Supplementary material for: The Antiepileptic Drug Oxcarbazepine Inhibits the Growth of Patient-Derived Isocitrate Dehydrogenase Mutant Glioma Stem-like Cells
Source: MDPI journal article supplement (doi:10.3390/cells12081200), 2023-04-20
Supplement: s1 [file s1]

## Supplementary Material

### (R)-MHD Dose Response

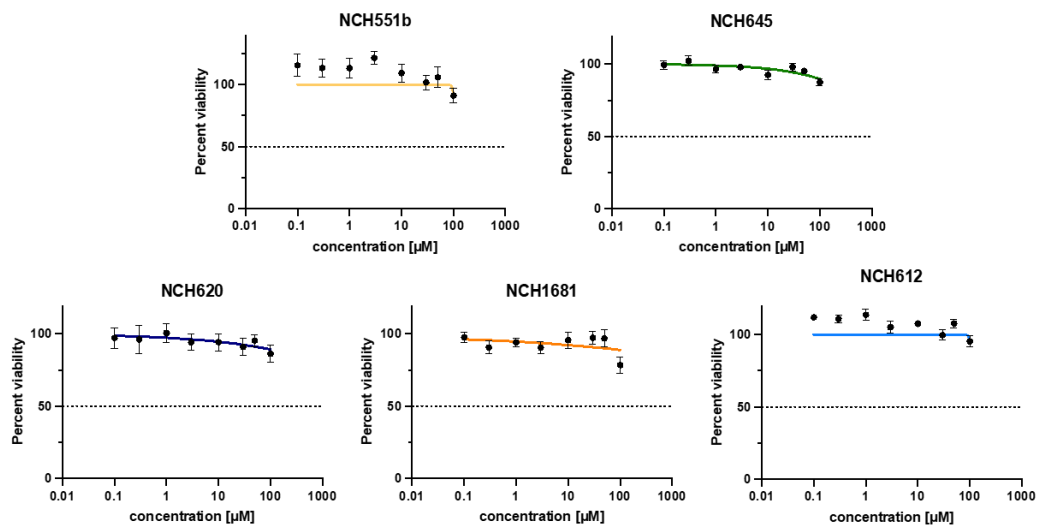

**Supplementary Figure S1:** Dose–response curves of (R) monohydroxy derivative (MHD) in GSC lines in which oxcarbazepine has shown an effect. (R)-MHD is one of the two metabolites of oxcarbazepine thought to exert an antiepileptic effect. In all of the tested glioma stem cell lines, (R)-MHD was not able to induce growth inhibition, suggesting that oxcarbazepine itself promotes the antineoplastic effect.
